# Supplementary material for: Low-intensity blood flow restriction calf muscle training leads to similar functional and structural adaptations than conventional low-load strength training: A randomized controlled trial
Source: PLoS One. 2020 Jun 30;15(6):e0235377. doi: 10.1371/journal.pone.0235377 (PMC7326162; doi:10.1371/journal.pone.0235377)
Supplement: S1 Table — Four heartbeats were used to determine TA mean by Doppler ultrasound (SonoSCape P20 with SonoScape L742 probe, SonoScape Europe S.r.l., Rome, Italy). Each condition was measured three times and the mean was calculated. The 7cm wide BFR cuff with a twist lock (mybimaxx GmbH, Kirchheim unter Teck, Germany) was placed below the patella of the left leg and tightened to the maximum. The difference between “TA mean no cuff” and “TA mean with cuff” in percent equaled the resulting reduction in arterial blood flow velocity. BFR = blood flow restriction training; TA = Time averaged arterial blood flow velocity. (XLSX) [file pone.0235377.s001.xlsx]

## Sheet: Subjects
BFR	Age	Height [cm]	Weight pre [kg]	Weight Post [kg]	RT exp. [y]
		178	94.4	92.5	6
		184	88.2	89.2	7
		192	87.8	87.1	3
		182	85.8	86.8	3
		192	87.2	79.6	6
		182	75.1	77.6	13
		175	74.6	77.7	6
		180	74.3	75.2	10
		182	71.9	71.9	7
		182	82.1	83.6	2
		180	89.1	89.4	5
		178	81	80	20
MW	27.3333	182.33	82.625	82.55	7.33333
STABW	7.04	5.02	5.98	6.47155	6.98
Min	18
Max	45
NoBFR	Age	Height [cm]	Weight pre [kg]	Weight Post [kg]	RT exp. [y]
		195	95.2	98	15
		186	69.6	71.4	3
		195	94.6	94.1	3
		180	93.4	94.7	4
		181	71.1	72.3	3
		196	86.6	85.9	3
		194	90.2	88.3	11
		183	67.1	66.7	2
		180	77.5	74.8	20
MW	28.86	185	83.94	82.9111	7.11111
STABW	7.41	7.76	11.62	11.7447	6.58492
Min	20
Max	45

## Sheet: Repetitions
BFR	TR1	TR2	TR3	TR4	TR5	TR6	TR7	TR8	TR9	TR10	TR11	TR12		Set1	Set2	Set3	Set4
	55	54	60	60	63	68	69	75	80	84	86	90		19.6	18	17	15.8
	46	46	50	45	57	52	53	57	56	50	58			18.5	11.5	11.3	10.5
	33	36	36	35	45	41	39	46	45	46	49	48		21.8	8.3	6.3	5.3
	48	46	48	42	50	41	40	41	40	41	42			16.6	9	8.7	9.4
	56	54	62	66	65	72	78	73	73	81	74	79		26.4	17.2	14.3	11.6
	43	47	54	56	55	55	61	77	75	77	78			26.2	15.3	10.6	9.5
	39	35	39	39	37	41	42	47	44	53	58			16.2	10.4	8.7	7.8
	43	44	44	46	52	53	53	56	57	51	44			21.7	10.2	9.1	8.4
	48	47	49	52	53	57	59	59	61	64	65	63		22.4	15.3	10.8	7.9
	52	38	49	45	44	48	47	46	46	51	49	50		17.4	10.6	9.9	9.2
	53	54	50	54	51	57	56	60	49	54	59	59		23.3	12.3	10.3	8.8
	41	45	47	47	47	44	48	46	46	47	46	46		20.1	10.5	7.8	7.4
Mean	46.4167	45.5	49	48.9167	51.5833	52.4167	53.75	56.9167	56	58.25	59	62.1429		20.85	12.3833	10.4	9.3
SD	6.96039	6.61266	7.48331	8.95908	7.92531	10.2554	11.7946	12.4788	13.558	14.6419	14.2574	16.7275		3.42039	3.24873	2.8775	2.5923
NoBFR	TR1	TR2	TR3	TR4	TR5	TR6	TR7	TR8	TR9	TR10	TR11	TR12		Set1	Set2	Set3	Set4
	99	90	96	83	103	95	112	112	121	105	129	100		37.6	24.3	21.7	20.1
	47	55	64	70	77	79	79	82	81	94	99			33.3	16.6	13.2	12.1
	53	37	45	40	40	47	45	47	47	49	47	44		16.2	10.8	9.7	8.4
	69	66	66	68	70	63	71	77	73	72	72	80		20.3	17.6	16.5	16.5
	51	49	58	45	61	63	62	71	68	70	61	80		27.5	14.3	10.8	8.9
	82	68	66	63	73	71	75	74	78	82	82	86		25.3	19.8	16.3	13.8
	51	54	65	62	63	59	55	72	69	75	74	82		24.3	16.3	13.1	11.4
	107	58	66	66	72	70	72	69	76	77	78			28.6	17.8	15.1	12.4
	76	44	46	56	63	45	58	58	58	61	69			18.5	15.5	12.5	11.2
Mean	70.5556	57.8889	63.5556	61.4444	69.1111	65.7778	69.8889	73.5556	74.5556	76.1111	79	78.6667		25.7333	17	14.3222	12.7556
SD	22.1591	15.5358	14.8165	13.0586	16.6692	15.4901	19.1471	17.8123	20.3784	16.6166	23.5372	18.576		6.93163	3.72089	3.59749	3.66917

## Sheet: TE
BFR	TE
	12
	11
	12
	12
	12
	11
	11
	11
	12
	12
	12
	12
MW	11.6667
STABW	0.492366
Prozent	96.17
NoBFR	TE
	12
	11
	12
	12
	12
	12
	12
	11
	11
MW	11.6667
STABW	0.5
Prozent	93.17

## Sheet: 1RM
BFR	BFR	Pre [kg]	Post [kg]
		225	300
		200	210
		192.5	240
		187.5	220
		177.5	200
		167.5	210
		157.5	180
		157.5	210
		142.5	165
		127.5	155
		125	210
		95	140
	MW	162.917	203.333
	STABW	36.5848	42.1218
	NoBFR	Pre [kg]	Post [kg]
		207.5	250
Gruppe		192.5	230
		187.5	225
		187.5	200
		162.5	180
		157.5	190
		137.5	195
		127.5	155
		107.5	150
	MW	163.056	197.222
	STABW	33.6753	33.5514

## Sheet: MT
BFR	Pre [cm]	Post [cm]
	2.73	2.84
	2.46	2.45
	2.15	2.37
	2.31	2.41
	1.53	1.55
	2.08	1.88
	2.02	2.11
	2.02	2.16
	1.71	1.65
	1.99	2.1
	2.48	2.69
	2.03	2.18
MW	2.12583	2.19917
STABW	0.332578	0.385262
NoBFR	Pre [cm]	Post [cm]
	1.95	2.09
	2.16	2.35
	2.23	2.13
	2.08	2.11
	1.9	2.07
	2.37	2.39
	2.25	2.14
	1.75	1.72
	1.81	1.9
MW	2.05556	2.1
STABW	0.214366	0.204512

## Sheet: CV
BFR	Pre [ml]	Post [ml]
	5031	5061
	4029	3990
	3451	3487
	3675	3736
	3298	3320
	3406	3471
	3115	3136
	2947	2935
	2957	2812
	3736	3778
	3481	3714
	3185	3187
MW	3525.92	3552.25
STABW	572.282	593.853
NoBFR	Pre [ml]	Post [ml]
	4250	4251
	3371	3369
	3818	3858
	3665	3691
	2948	2986
	3970	3933
	4678	4465
	2780	2759
	3446	3363
MW	3658.44	3630.56
STABW	603.754	563.822

## Sheet: Stiffness
BFR		Pre FT [sec]	Post FT [sec]	Differenz [sec]		Pre height [cm]	Post height [cm]	Differenz [cm]		Pre GCT [ms]	Post GCT [ms]	Differenz [ms]		Pre Stiffness [kN/m]	Post Stiffness [kN/m]	Differenz [kN/m]			NoBFR		Pre FT [sec]	Post FT [sec]	Differenz [sec]		Pre height [cm]	Post height [cm]	Differenz [cm]		Pre GCT [ms]	Post GCT [ms]	Differenz [ms]		Pre Stiffness [kN/m]	Post Stiffness [kN/m]	Differenz [kN/m]
		0.227	0.3245	0.0975		6.3	13.05	6.75		0.161	0.1685	0.0075		53.32	44.3331	-8.98685					0.5225	0.4395	-0.083		33.45	23.7	-9.75		0.19	0.17	-0.02		32.8547	42.8577	10.003
		0.255	0.3625	0.1075		8	16.25	8.25		0.174	0.1805	0.0065		45.16	37.9946	-7.16535					0.529	0.461	-0.068		34.4	26.1	-8.3		0.188	0.1755	-0.0125		33.6416	40.0928	6.45122
		0.267	0.386	0.119		8.7	18.3	9.6		0.171	0.203	0.032		45.95	30.8322	-15.1178					0.522	0.475	-0.047		33.4	27.7	-5.7		0.1835	0.182	-0.0015		35.0104	37.4292	2.4188
		0.314	0.4155	0.1015		12.1	21.2	9.1		0.175	0.2005	0.0255		42.32	30.5324	-11.7876					0.5155	0.4885	-0.027		32.55	29.25	-3.3		0.184	0.184	0		34.9552	36.3882	1.43298
		0.341	0.4385	0.0975		14.3	23.6	9.3		0.179	0.2	0.021		39.85	30.2733	-9.57672					0.5195	0.4755	-0.044		33.1	27.75	-5.35		0.1805	0.1835	0.003		36.2186	36.9014	0.682835
		0.275	0.456	0.181		9.3	25.6	16.3		0.168	0.21	0.042		47.01	27.5356	-19.4744					0.5475	0.4935	-0.054		36.75	29.95	-6.8		0.1955	0.19	-0.0055		30.932	34.3447	3.41269
		0.284	0.449	0.165		9.9	24.7	14.8		0.171	0.2075	0.0365		45.21	28.2087	-17.0013					0.535	0.483	-0.052		35.1	28.65	-6.45		0.198	0.189	-0.009		30.379	34.7631	4.38408
	MW	0.280429	0.404571	0.124143		9.8	20.3857	10.5857		0.171286	0.195714	0.0244286		45.5457	32.8157	-12.73				MW	0.527286	0.473714	-0.0535714		34.1071	27.5857	-6.52143		0.1885	0.182	-0.0065		33.4274	37.5396	4.11223
	STABW	0.0376823	0.0490165	0.0344912		2.66145	4.69155	3.54527		0.00573627	0.0153266	0.0137399		4.2003	6.11267	4.56873				STABW	0.0109653	0.0184094	0.0178779		1.43916	2.11497	2.08544		0.00646787	0.00713559	0.00798958		2.18037	3.01281	3.22857
		0.363	0.3415	-0.0215		16.15	14.3	-1.85		0.175	0.1805	0.0055		38.1	37.3976	-0.702392					0.3605	0.3885	0.028		16.1	18.65	2.55		0.177	0.178	0.001		29.6509	29.619	-0.0319715
		0.3995	0.3715	-0.028		19.6	16.95	-2.65		0.1655	0.1735	0.008		41.217	39.2252	-1.99182					0.427	0.339	-0.088		22.45	14.1	-8.35		0.19	0.2075	0.0175		25.5616	23.8138	-1.74779
		0.403	0.3825	-0.0205		20.05	18	-2.05		0.168	0.1685	0.0005		40.2596	41.2021	0.942478					0.4085	0.36	-0.0485		20.55	16	-4.55		0.1795	0.1815	0.002		28.2252	29.075	0.849847
		0.4085	0.377	-0.0315		20.55	17.45	-3.1		0.1675	0.1605	-0.007		40.4791	44.6634	4.18433					0.4445	0.3685	-0.076		24.2	16.7	-7.5		0.1865	0.1775	-0.009		25.8041	30.062	4.25797
		0.4075	0.394	-0.0135		20.45	19.05	-1.4		0.1645	0.1665	0.002		41.4994	41.5139	0.0144584					0.4405	0.389	-0.0515		23.9	18.65	-5.25		0.18	0.1795	-0.0005		27.4821	29.2373	1.75525
		0.4025	0.3935	-0.009		20	19.1	-0.9		0.1635	0.164	0.0005		42.1848	42.9018	0.716964					0.4285	0.4135	-0.015		22.75	21	-1.75		0.1835	0.181	-0.0025		26.7388	28.2777	1.53885
		0.4195	0.4025	-0.017		21.75	19.95	-1.8		0.183	0.171	-0.012		34.4399	39.8019	5.36197					0.414	0.4055	-0.0085		21.35	20.25	-1.1		0.184	0.179	-0.005		26.8892	29.1267	2.2375
	MW	0.4005	0.380357	-0.0201429		19.7929	17.8286	-1.96429		0.169571	0.169214	-0.000357143		39.74	40.958	1.218				MW	0.417643	0.380571	-0.0370714		21.6143	17.9071	-3.70714		0.182929	0.183429	0.0005		27.1931	28.4588	1.26567
	STABW	0.0177553	0.0202211	0.0078619		1.74414	1.87102	0.73695		0.00702038	0.0065819	0.00696248		2.67243	2.41153	2.63748				STABW	0.0283177	0.0262574	0.0407957		2.75404	2.44087	3.84734		0.00446681	0.0107138	0.0083865		1.41889	2.11962	1.87751
		0.4185	0.4475	0.029		21.7	24.65	2.95		0.191	0.201	0.01		31.6684	28.2439	-3.42453					0.3725	0.41	0.0375		17.45	20.7	3.25		0.1725	0.1835	0.011		42.7574	36.5914	-6.16601
		0.3805	0.445	0.0645		18.2	24.4	6.2		0.1935	0.196	0.0025		31.7297	29.4765	-2.25314					0.3845	0.3815	-0.003		18.2	17.9	-0.3		0.1865	0.1825	-0.004		36.3117	37.4244	1.11266
		0.392	0.464	0.072		19.3	26.4	7.1		0.1825	0.1975	0.015		35.1909	28.933	-6.25788					0.352	0.401	0.049		15.5	19.85	4.35		0.183	0.1955	0.0125		38.4467	32.8821	-5.56464
		0.4205	0.476	0.0555		22.15	27.8	5.65		0.1955	0.2015	0.006		30.9392	27.6268	-3.31234					0.384	0.3965	0.0125		18.7	19.3	0.6		0.1935	0.193	-0.0005		34.3914	33.5833	-0.808032
		0.4285	0.455	0.0265		22.5	25.4	2.9		0.1835	0.188	0.0045		33.7447	31.5748	-2.1699					0.3635	0.3925	0.029		17.05	18.95	1.9		0.192	0.188	-0.004		35.3681	35.3688	0.0006881
		0.4325	0.449	0.0165		23.2	24.75	1.55		0.199	0.192	-0.007		30.1416	30.5003	0.358639					0.363	0.4075	0.0445		16.8	20.35	3.55		0.1845	0.194	0.0095		37.7741	33.1205	-4.65361
		0.43	0.452	0.022		22.8	25.05	2.25		0.1885	0.193	0.0045		32.5258	30.3346	-2.19121					0.3795	0.361	-0.0185		18.1	16	-2.1		0.194	0.203	0.009		34.1428	31.6064	-2.53637
	MW	0.414643	0.4555	0.0408571		21.4071	25.4929	4.08571		0.1905	0.195571	0.00507143		32.2772	29.5271	-2.75005					0.371286	0.392857	0.0215714		17.4	19.0071	1.60714		0.186571	0.191357	0.00478571		37.0275	34.3681	-2.65933
	STABW	0.0203075	0.0109659	0.022505		1.90229	1.21155	2.17939		0.00610328	0.00491959	0.0067911		1.71885	1.37873	1.98476				STABW	0.0122911	0.0169895	0.0254254		1.07355	1.61952	2.32655		0.00761265	0.00723253	0.00730786		2.99834	2.1328	2.87114
		0.3675	0.37	0.0025		16.55	16.8	0.25		0.1795	0.1825	0.003		35.7432	34.8956	-0.847624					0.2805	0.2845	0.004		9.75	10	0.25		0.1915	0.184	-0.0075		36.9829	39.9627	2.97984
		0.3055	0.355	0.0495		11.5	15.5	4		0.1705	0.188	0.0175		40.6927	33.4751	-7.21757					0.2875	0.267	-0.0205		10.1	8.75	-1.35		0.174	0.166	-0.008		44.2497	48.8479	4.59819
		0.337	0.347	0.01		14.45	14.8	0.35		0.176	0.1955	0.0195		38.2506	31.6132	-6.63737					0.2935	0.284	-0.0095		10.55	9.9	-0.65		0.1665	0.166	-0.0005		46.4846	47.7754	1.29088
		0.3295	0.3445	0.015		13.4	14.6	1.2		0.18	0.18	0		36.3308	36.2517	-0.0791102					0.3095	0.305	-0.0045		11.8	11.4	-0.4		0.167	0.1585	-0.0085		46.2132	50.8689	4.65571
		0.3445	0.323	-0.0215		14.65	12.8	-1.85		0.1785	0.188	0.0095		36.4797	34.2021	-2.27765					0.3035	0.2815	-0.022		11.4	9.7	-1.7		0.166	0.1665	0.0005		46.4511	47.6139	1.16287
		0.383	0.294	-0.089		18	10.6	-7.4		0.189	0.1895	0.0005		32.2285	34.4672	2.23871					0.306	0.296	-0.01		11.55	10.8	-0.75		0.163	0.1565	-0.0065		47.8135	52.4262	4.61263
		0.3105	0.368	0.0575		11.85	16.65	4.8		0.192	0.199	0.007		32.9273	29.945	-2.98239					0.2905	0.296	0.0055		10.4	10.75	0.35		0.1645	0.1655	0.001		47.6322	47.5499	-0.0823714
	MW	0.339643	0.343071	0.00342857		14.3429	14.5357	0.192857		0.180786	0.188929	0.00814286		36.0933	33.55	-2.54329				MW	0.295857	0.287714	-0.00814286		10.7929	10.1857	-0.607143		0.170357	0.166143	-0.00421429		45.1182	47.8636	2.74539
	STABW	0.0282971	0.0268242	0.0489706		2.36422	2.20241	4.05354		0.00740977	0.00667975	0.0078619		2.91822	2.12639	3.43241				STABW	0.0107032	0.012436	0.010777		0.789213	0.87403	0.759621		0.00994868	0.00885868	0.00431912		3.77194	3.94568	1.96808
		0.4265	0.421	-0.0055		22.3	21.75	-0.55		0.1575	0.1665	0.009		44.3486	36.5208	-7.82778					0.4605	0.423	-0.0375		26.05	21.95	-4.1		0.1895	0.1935	0.004		25.4376	25.3135	-0.124091
		0.389	0.4145	0.0255		18.55	21.1	2.55		0.1505	0.164	0.0135		48.5839	37.6036	-10.9804					0.4285	0.4175	-0.011		23.2	21.35	-1.85		0.1875	0.197	0.0095		26.6347	24.5746	-2.0601
		0.3855	0.434	0.0485		18.2	23.1	4.9		0.1485	0.1565	0.008		50.0725	40.5188	-9.55365					0.3995	0.3765	-0.023		19.6	17.4	-2.2		0.189	0.1925	0.0035		26.2805	26.2673	-0.0131965
		0.3835	0.413	0.0295		18.05	20.9	2.85		0.153	0.156	0.003		47.3515	41.1478	-6.20378					0.405	0.39	-0.015		20.1	18.7	-1.4		0.188	0.1935	0.0055		26.4998	25.8451	-0.654669
		0.3915	0.4	0.0085		18.85	19.6	0.75		0.1485	0.1565	0.008		49.8465	41.297	-8.54954					0.41	0.406	-0.004		20.6	20.3	-0.3		0.19	0.2015	0.0115		25.8378	23.8121	-2.02573
		0.408	0.399	-0.009		20.4	19.5	-0.9		0.1495	0.158	0.0085		48.6789	40.5133	-8.16565					0.445	0.4245	-0.0205		24.3	22.1	-2.2		0.1905	0.2055	0.015		25.2609	22.7693	-2.49156
		0.401	0.4135	0.0125		19.7	21	1.3		0.1535	0.1585	0.005		46.5806	40.0294	-6.5512					0.407	0.437	0.03		20.6	23.4	2.8		0.1955	0.205	0.0095		24.669	22.7285	-1.94052
	MW	0.397857	0.413571	0.0157143		19.4357	20.9929	1.55714		0.151571	0.159429	0.00785714		47.9232	39.6615	-8.26171				MW	0.422214	0.410643	-0.0115714		22.0643	20.7429	-1.32143		0.19	0.198357	0.00835714		25.8029	24.4729	-1.32998
	STABW	0.0153344	0.0120431	0.0203467		1.5154	1.23842	2.04235		0.00329682	0.00413752	0.00330043		2.00971	1.85197	1.65839				STABW	0.0231568	0.0212126	0.0211353		2.46284	2.09253	2.14396		0.00264575	0.00560293	0.00422999		0.721094	1.42604	1.03145
		0.2795	0.2445	-0.035		9.6	7.5	-2.1		0.1775	0.177	-0.0005		33.8634	36.6617	2.79831					0.412	0.486	0.074		20.8	28.95	8.15		0.2105	0.1895	-0.021		26.7648	30.2827	3.51789
		0.257	0.278	0.021		8.2	9.45	1.25		0.1715	0.174	0.0025		36.9085	36.3595	-0.549036					0.446	0.4965	0.0505		24.4	30.25	5.85		0.195	0.1835	-0.0115		29.5519	31.9549	2.40301
		0.2845	0.3145	0.03		10.1	12.15	2.05		0.1685	0.1755	0.007		37.0278	34.9199	-2.10784					0.459	0.483	0.024		25.8	28.6	2.8		0.182	0.174	-0.008		33.3323	35.4458	2.1135
		0.28	0.3245	0.0445		9.9	13.25	3.35		0.169	0.18	0.011		37.1402	33.1639	-3.97624					0.4675	0.487	0.0195		26.8	29.1	2.3		0.1795	0.1755	-0.004		33.9207	34.8368	0.916055
		0.282	0.3225	0.0405		10.05	13.25	3.2		0.1675	0.1825	0.015		37.5762	32.815	-4.76113					0.4675	0.5	0.0325		26.8	30.65	3.85		0.2015	0.189	-0.0125		29.0164	30.2548	1.2384
		0.2565	0.298	0.0415		8.2	10.95	2.75		0.1735	0.1865	0.013		36.2013	31.7288	-4.47246					0.4715	0.493	0.0215		27.3	29.8	2.5		0.19	0.193	0.003		30.7111	29.2871	-1.42401
		0.2735	0.332	0.0585		9.35	13.65	4.3		0.1725	0.1785	0.006		35.854	33.2231	-2.63092					0.484	0.464	-0.02		28.7	26.4	-2.3		0.191	0.174	-0.017		30.1786	35.6385	5.45989
	MW	0.273286	0.302	0.0287143		9.34286	11.4571	2.11429		0.171429	0.179143	0.00771429		36.3673	34.1246	-2.24276				MW	0.458214	0.487071	0.0288571		25.8	29.1071	3.30714		0.192786	0.182643	-0.0101429		30.4965	32.5286	2.0321
	STABW	0.0117787	0.0313076	0.0304396		0.822815	2.29718	2.09756		0.00346925	0.00429839	0.00562626		1.24823	1.88212	2.66985				STABW	0.02345	0.0118407	0.0290742		2.5697	1.40102	3.25518		0.0107891	0.00812257	0.00803489		2.48069	2.72519	2.15723
		0.473	0.516	0.043		27.45	32.65	5.2		0.1555	0.1645	0.009		37.8094	35.1764	-2.63297					0.377	0.446	0.069		17.4	24.45	7.05		0.1875	0.194	0.0065		34.1899	30.6646	-3.52523
		0.4935	0.506	0.0125		29.85	31.4	1.55		0.1585	0.176	0.0175		36.312	31.0739	-5.23814					0.38	0.484	0.104		17.7	28.75	11.05		0.187	0.188	0.001		34.2924	31.603	-2.68945
		0.49	0.506	0.016		29.5	31.45	1.95		0.1665	0.174	0.0075		33.1819	31.9991	-1.18282					0.3995	0.483	0.0835		19.55	28.6	9.05		0.189	0.171	-0.018		33.257	37.5941	4.33705
		0.4825	0.5045	0.022		28.6	31.2	2.6		0.167	0.17	0.003		33.1805	33.0846	-0.095956					0.409	0.4905	0.0815		20.5	29.5	9		0.1835	0.1785	-0.005		35.0022	34.6042	-0.398029
		0.488	0.515	0.027		29.35	32.5	3.15		0.1675	0.1775	0.01		32.8919	30.5531	-2.33883					0.3995	0.486	0.0865		19.55	28.95	9.4		0.1865	0.1805	-0.006		34.0974	33.9762	-0.121213
		0.4665	0.4995	0.033		26.75	30.6	3.85		0.163	0.1735	0.0105		34.8004	32.0289	-2.77149					0.395	0.484	0.089		19.1	28.75	9.65		0.181	0.178	-0.003		36.0007	34.8996	-1.10111
		0.4505	0.5	0.0495		25.05	30.65	5.6		0.1655	0.171	0.0055		34.3307	33.1007	-1.23					0.394	0.4955	0.1015		19	30.1	11.1		0.182	0.1795	-0.0025		35.6812	34.1895	-1.49173
	MW	0.477714	0.506714	0.029		28.0786	31.4929	3.41429		0.163357	0.172357	0.009		34.6438	32.4309	-2.21289				MW	0.393429	0.481286	0.0878571		18.9714	28.4429	9.47143		0.185214	0.181357	-0.00385714		34.6458	33.933	-0.712817
	STABW	0.01537	0.00655653	0.0137022		1.7502	0.812111	1.55502		0.00466114	0.00433699	0.00458258		1.83819	1.53456	1.64139				STABW	0.0113226	0.016186	0.012006		1.08852	1.83835	1.38108		0.00303942	0.00747058	0.00752061		0.965833	2.27182	2.53392
		0.326	0.324	-0.002		13.25	12.9	-0.35		0.1675	0.173	0.0055		35.8242	34.1411	-1.68312					0.3165	0.2495	-0.067		12.35	8.15	-4.2		0.213	0.213	0		21.6902	23.9621	2.27193
		0.347	0.323	-0.024		14.8	12.8	-2		0.162	0.1605	-0.0015		37.2937	39.0245	1.73078					0.348	0.262	-0.086		14.85	8.5	-6.35		0.222	0.2055	-0.0165		19.3707	24.008	4.63737
		0.391	0.353	-0.038		19.1	15.35	-3.75		0.165	0.1655	0.0005		35.4632	36.2175	0.754321					0.358	0.27	-0.088		15.75	8.95	-6.8		0.212	0.2025	-0.0095		21.0205	24.2134	3.19289
		0.394	0.3625	-0.0315		19.8	16.15	-3.65		0.1725	0.163	-0.0095		33.4931	36.9556	3.46243					0.3445	0.2855	-0.059		14.55	10	-4.55		0.2145	0.197	-0.0175		20.5752	24.9697	4.39447
		0.4065	0.3485	-0.058		21.1	14.9	-6.2		0.1735	0.1635	-0.01		32.5914	37.0669	4.47552					0.354	0.3165	-0.0375		15.4	12.6	-2.8		0.227	0.201	-0.026		18.5454	24.2941	5.7487
		0.4035	0.338	-0.0655		20.9	14	-6.9		0.1785	0.17	-0.0085		33.129	34.8942	1.76529					0.3575	0.29	-0.0675		15.7	10.6	-5.1		0.2035	0.1955	-0.008		22.3874	26.1269	3.73954
		0.4035	0.3625	-0.041		20.5	16.1	-4.4		0.1785	0.1685	-0.01		32.165	34.8592	2.6942					0.367	0.2995	-0.0675		16.55	11.05	-5.5		0.2055	0.198	-0.0075		21.8242	24.4739	2.64966
	MW	0.381643	0.3445	-0.0371429		18.4929	14.6	-3.89286		0.171071	0.166286	-0.00478571		34.2799	36.1656	1.88563				MW	0.349357	0.281857	-0.0675		15.0214	9.97857	-5.04286		0.213929	0.201786	-0.0121429		20.7734	24.5783	3.80494
	STABW	0.031911	0.0166383	0.021191		3.15759	1.40208	2.26705		0.00645774	0.00440508	0.00625738		1.92076	1.68495	1.99591				STABW	0.0162217	0.0229959	0.0170049		1.34532	1.58084	1.35352		0.00837371	0.00601981	0.0084937		1.38934	0.761687	1.21671
		0.391	0.3655	-0.0255		18.8	16.35	-2.45		0.171	0.173	0.002		31.9592	31.8629	-0.0963341					0.3465	0.372	0.0255		14.75	17	2.25		0.1925	0.178	-0.0145		28.7921	31.24	2.44788
		0.392	0.4055	0.0135		19	20.2	1.2		0.1645	0.177	0.0125		34.2626	29.9098	-4.35285					0.3055	0.369	0.0635		11.45	16.7	5.25		0.151	0.171	0.02		45.3984	33.6	-11.7984
		0.3975	0.4315	0.034		19.6	22.8	3.2		0.1735	0.1905	0.017		31.718	25.9113	-5.80674					0.267	0.366	0.099		8.75	16.4	7.65		0.151	0.192	0.041		46.9565	27.44	-19.5165
		0.3895	0.428	0.0385		18.65	22.45	3.8		0.1605	0.177	0.0165		35.8041	29.4717	-6.3324					0.29	0.376	0.086		10.3	17.3	7		0.177	0.19	0.013		35.8653	27.77	-8.0953
		0.4055	0.413	0.0075		20.25	20.95	0.7		0.159	0.186	0.027		36.1317	27.2248	-8.90685					0.3265	0.349	0.0225		13.1	14.9	1.8		0.165	0.206	0.041		38.1978	24.55	-13.6478
		0.4305	0.417	-0.0135		22.75	21.35	-1.4		0.1625	0.18	0.0175		34.4546	28.8171	-5.63752					0.3195	0.333	0.0135		12.55	13.6	1.05		0.173	0.175	0.002		35.3091	33.05	-2.25909
		0.407	0.4225	0.0155		20.4	21.9	1.5		0.1735	0.1775	0.004		30.8943	29.6022	-1.29204					0.3305	0.344	0.0135		13.4	14.5	1.1		0.1725	0.176	0.0035		35.1898	32.46	-2.72984
	MW	0.401857	0.411857	0.01		19.9214	20.8571	0.935714		0.166357	0.180143	0.0137857		33.6035	28.9714	-4.63211				MW	0.312214	0.358429	0.0462143		12.0429	15.7714	3.72857		0.168857	0.184	0.0151429		37.9584	30.0157	-7.94271
	STABW	0.0144156	0.0222743	0.0232719		1.42386	2.17551	2.26177		0.0061962	0.00604645	0.00858709		2.08133	1.92907	3.03761				STABW	0.0269256	0.0163591	0.0360553		2.03212	1.42562	2.83973		0.0147668	0.0124766	0.0206251		6.31746	3.44187	7.62487
																				NoBFR		Pre FT [sec]	Post FT [sec]	Differenz [sec]		Pre height [cm]	Post height [cm]	Differenz [cm]		Pre GCT [ms]	Post GCT [ms]	Differenz [ms]		Pre Stiffness [kN/m]	Post Stiffness [kN/m]	Differenz [kN/m]
		0.323	0.3525	0.0295		12.95	15.6	2.65		0.1865	0.1915	0.005		32.7469	31.2747	-1.4722
		0.332	0.332	0		13.85	14.15	0.3		0.194	0.192	-0.002		30.7825	31.7503	0.967787						0.527286	0.473714	-0.0535714		34.1071	27.5857	-6.52143		0.1885	0.182	-0.0065		33.4274	37.5396	4.11223
		0.35	0.3225	-0.0275		15.2	12.95	-2.25		0.1885	0.189	0.0005		31.5273	32.6731	1.14572						0.417643	0.380571	-0.0370714		21.6143	17.9071	-3.70714		0.182929	0.183429	0.0005		27.1931	28.4588	1.26567
		0.3475	0.3135	-0.034		14.9	12.35	-2.55		0.1945	0.1895	-0.005		30.0869	32.844	2.75714						0.371286	0.392857	0.0215714		17.4	19.0071	1.60714		0.186571	0.191357	0.00478571		37.0275	34.3681	-2.65933
		0.3685	0.3235	-0.045		16.7	13	-3.7		0.198	0.1895	-0.0085		28.4762	32.4823	4.00608						0.295857	0.287714	-0.00814286		10.7929	10.1857	-0.607143		0.170357	0.166143	-0.00421429		45.1182	47.8636	2.74539
		0.3695	0.3435	-0.026		16.75	14.65	-2.1		0.1945	0.192	-0.0025		29.3579	31.2353	1.87748						0.422214	0.410643	-0.0115714		22.0643	20.7429	-1.32143		0.19	0.198357	0.00835714		25.8029	24.4729	-1.32998
		0.3795	0.327	-0.0525		17.65	13.2	-4.45		0.1995	0.1905	-0.009		27.8928	32.0396	4.14682						0.458214	0.487071	0.0288571		25.8	29.1071	3.30714		0.192786	0.182643	-0.0101429		30.4965	32.5286	2.0321
	MW	0.352857	0.330643	-0.0222143		15.4286	13.7	-1.72857		0.193643	0.190571	-0.00307143		30.1244	32.0428	1.91841						0.393429	0.481286	0.0878571		18.9714	28.4429	9.47143		0.185214	0.181357	-0.00385714		34.6458	33.933	-0.712817
	STABW	0.0207961	0.0133501	0.0282413		1.69628	1.1431	2.43804		0.00469676	0.00127242	0.00496176		1.71098	0.65316	1.95901						0.349357	0.281857	-0.0675		15.0214	9.97857	-5.04286		0.213929	0.201786	-0.0121429		20.7734	24.5783	3.80494
																						0.312214	0.358429	0.0462143		12.0429	15.7714	3.72857		0.168857	0.184	0.0151429		37.9584	30.0157	-7.94271
																					MW	0.394167	0.394905	0.000738095		19.7571	19.8587	0.101587		0.186571	0.185675	-0.000896825		32.4937	32.6399	0.146165
		0.3245	0.329	0.0045		12.95	13.3	0.35		0.1715	0.173	0.0015		41.02	40.42	-0.6					STABW	0.0725203	0.0776408	0.0501852		7.24292	7.3496	5.01067		0.0132019	0.0105082	0.0089462		7.32732	7.21539	3.82263
		0.3425	0.353	0.0105		14.4	15.3	0.9		0.164	0.164	0		43.8035	43.69	-0.113514
		0.3475	0.355	0.0075		14.85	15.4	0.55		0.1615	0.166	0.0045		44.9144	42.71	-2.20438
		0.336	0.362	0.026		13.9	16.1	2.2		0.1545	0.173	0.0185		48.946	39.52	-9.42603
		0.3555	0.365	0.0095		15.5	16.3	0.8		0.159	0.164	0.005		45.8995	43.36	-2.53953
		0.36	0.373	0.013		15.95	17.1	1.15		0.1595	0.169	0.0095		45.5309	40.91	-4.62087
		0.3675	0.393	0.0255		16.6	18.9	2.3		0.16	0.159	-0.001		45.0905	45.11	0.0194714
	MW	0.347643	0.361429	0.0137857		14.8786	16.0571	1.17857		0.161429	0.166857	0.00542857		45.0293	42.2457	-2.78355
	STABW	0.0147555	0.0196117	0.00858224		1.25195	1.7242	0.775058		0.005287	0.0051455	0.00676651		2.3785	2.01222	3.35776
		0.27	0.3095	0.0395		8.95	11.85	2.9		0.1965	0.1575	-0.039		31.4042	43.4575	12.0533
		0.261	0.3275	0.0665		8.55	13.2	4.65		0.183	0.173	-0.01		36.0358	36.275	0.239284
		0.292	0.3255	0.0335		10.45	13.05	2.6		0.1905	0.1665	-0.024		31.9384	39.1935	7.25507
		0.281	0.321	0.04		9.65	12.65	3		0.1835	0.1725	-0.011		34.4313	36.6896	2.25823
		0.2815	0.3005	0.019		9.75	11.1	1.35		0.1965	0.1585	-0.038		30.6041	43.1912	12.5871
		0.2865	0.3085	0.022		10.1	11.65	1.55		0.1885	0.1645	-0.024		32.7086	40.1537	7.44513
		0.279	0.313	0.034		9.55	12	2.45		0.1785	0.163	-0.0155		36.6981	40.745	4.04693
	MW	0.278714	0.315071	0.0363571		9.57143	12.2143	2.64286		0.188143	0.165071	-0.0230714		33.4029	39.9579	6.55501
	STABW	0.0103274	0.00990971	0.0155609		0.647982	0.774443	1.08989		0.00690841	0.00612664	0.0119179		2.35594	2.834	4.70002
BFR		Pre FT [sec]	Post FT [sec]	Differenz [sec]		Pre height [cm]	Post height [cm]	Differenz [cm]		Pre GCT [ms]	Post GCT [ms]	Differenz [ms]		Pre Stiffness [kN/m]	Post Stiffness [kN/m]	Differenz [kN/m]
		0.280429	0.404571	0.124143		9.8	20.3857	10.5857		0.171286	0.195714	0.0244286		45.5457	32.8157	-12.73
		0.4005	0.380357	-0.0201429		19.7929	17.8286	-1.96429		0.169571	0.169214	-0.000357143		39.74	40.958	1.218
		0.414643	0.4555	0.0408571		21.4071	25.4929	4.08571		0.1905	0.195571	0.00507143		32.2772	29.5271	-2.75005
		0.339643	0.343071	0.00342857		14.3429	14.5357	0.192857		0.180786	0.188929	0.00814286		36.0933	33.55	-2.54329
		0.397857	0.413571	0.0157143		19.4357	20.9929	1.55714		0.151571	0.159429	0.00785714		47.9232	39.6615	-8.26171
		0.273286	0.302	0.0287143		9.34286	11.4571	2.11429		0.171429	0.179143	0.00771429		36.3673	34.1246	-2.24276
		0.477714	0.506714	0.029		28.0786	31.4929	3.41429		0.163357	0.172357	0.009		34.6438	32.4309	-2.21289
		0.381643	0.3445	-0.0371429		18.4929	14.6	-3.89286		0.171071	0.166286	-0.00478571		34.2799	36.1656	1.88563
		0.401857	0.411857	0.01		19.9214	20.8571	0.935714		0.166357	0.180143	0.0137857		33.6035	28.9714	-4.63211
		0.352857	0.330643	-0.0222143		15.4286	13.7	-1.72857		0.193643	0.190571	-0.00307143		30.1244	32.0428	1.91841
		0.347643	0.361429	0.0137857		14.8786	16.0571	1.17857		0.161429	0.166857	0.00542857		45.0293	42.2457	-2.78355
		0.278714	0.315071	0.0363571		9.57143	12.2143	2.64286		0.188143	0.165071	-0.0230714		33.4029	39.9579	6.55501
	MW	0.362232	0.380774	0.0185417		16.7077	18.3012	1.59345		0.173262	0.17744	0.00417857		37.4192	35.2043	-2.21494
	STABW	0.0626339	0.0604529	0.0413083		5.60288	5.89347	3.66954		0.0126941	0.0127373	0.0115435		5.80314	4.51712	5.01169

## Sheet: VAS
BFR		Pre	Set 1	Set 2	Set 3	Set 4
		0	5	7	9	10
		0	5	5	7	9
		1.5	2.2	3.9	5.4	5.4
		0	7	6	6	6
		0	1.4	2.2	3.5	5
		2	3	3	4	5
		0	2.3	3.9	5.8	6.5
		0.1	8.4	5.2	5	6.5
		0	0.8	2.7	3.4	4.3
		0	2.5	1.5	1.8	1.9
		0	3.5	4.9	6.2	8
		3	5	5	7	8
	MW	0.55	3.84167	4.19167	5.34167	6.3
	STABW	1.02824	2.29008	1.62394	1.95144	2.22547
NoBFR		Pre [cm]	Satz 1 [cm]	Satz 2 [cm]	Satz 3 [cm]	Satz 4 [cm]
		0	4.4	4.6	6.8	7.4
		0	0.1	0.2	1.2	2.6
		0	2.7	5.5	7	6.4
		0	6	7	8	9
		0.3	3.2	3.8	3.9	4.5
		0	3.3	4.6	6.9	7.1
		0	3.8	4.6	5.1	6
		0	3	3	3	3
		0.1	1.5	2.9	2.8	4.1
	MW	0.0444444	3.11111	4.02222	4.96667	5.56667
	STABW	0.101379	1.67216	1.90445	2.35425	2.15232
